# Supplementary material for: Critical role of zeolites as H2S scavengers in argyrodite Li6PS5Cl solid electrolytes for all-solid-state batteries
Source: Royal Society of Chemistry journal article supplement (doi:10.1039/d1ta04799j), 2021-01-01
Supplement: d1ta04799j1.pdf [file d1ta04799j1.pdf]

## *Supplementary Information*

### **Critical role of zeolites as H<sub>2</sub>S scavengers in argyrodite Li<sub>6</sub>PS<sub>5</sub>Cl solid electrolytes for all-solid-state batteries**

Donggun Lee,<sup>†</sup> Kern-Ho Park,<sup>†</sup> So Yeun Kim,<sup>‡</sup> Jae Yup Jung,<sup>‡</sup> Wonrak Lee,<sup>†</sup> KyungSu Kim,<sup>†</sup>  
Goojin Jung,<sup>†</sup> Ji-Sang Yu,<sup>†</sup> Jungkyu Choi,<sup>‡</sup> Min-Sik Park,<sup>‡,\*</sup> Woosuk Cho<sup>†,\*</sup>

<sup>†</sup> Advanced Batteries Research Center, Korea Electronics Technology Institute, 25 Saenari-ro, Bundang-gu, Seongnam 13509, Republic of Korea

<sup>‡</sup> Department of Advanced Materials Engineering for Information and Electronics, Integrated Education Program for Frontier Materials (BK21 Four), Kyung Hee University, 1732 Deogyong-daero, Giheung-gu, Yongin 17104, Republic of Korea

<sup>‡</sup> Department of Chemical & Biological Engineering, College of Engineering, Korea University, Anam-dong, Seongbuk-gu, Seoul 02841, Republic of Korea

\*Corresponding authors

cho4153@keti.re.kr (W. Cho) and mspark@khu.ac.kr (M.-S. Park)

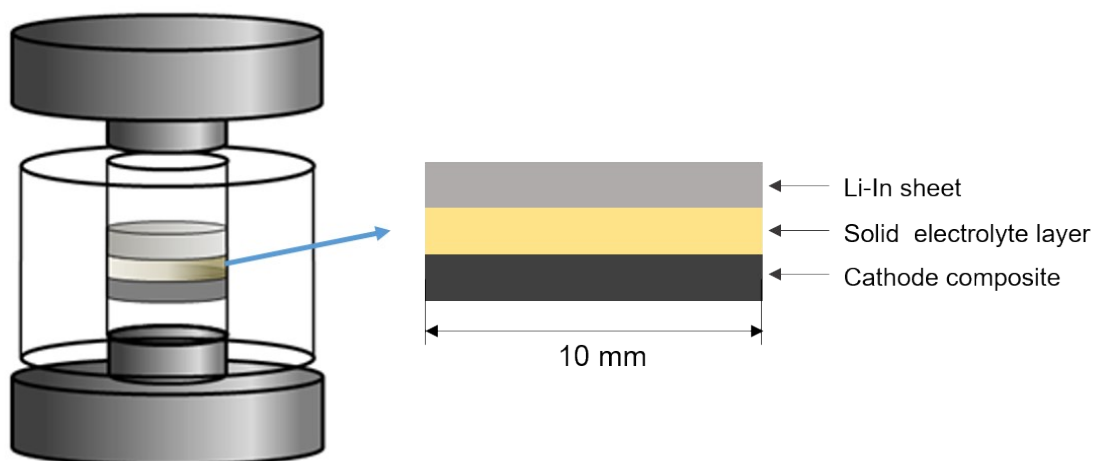

**Fig. S1** A schematic for cell configuration of ASSB assembled with P-Li<sub>6</sub>PS<sub>5</sub>Cl and Z-Li<sub>6</sub>PS<sub>5</sub>Cl.

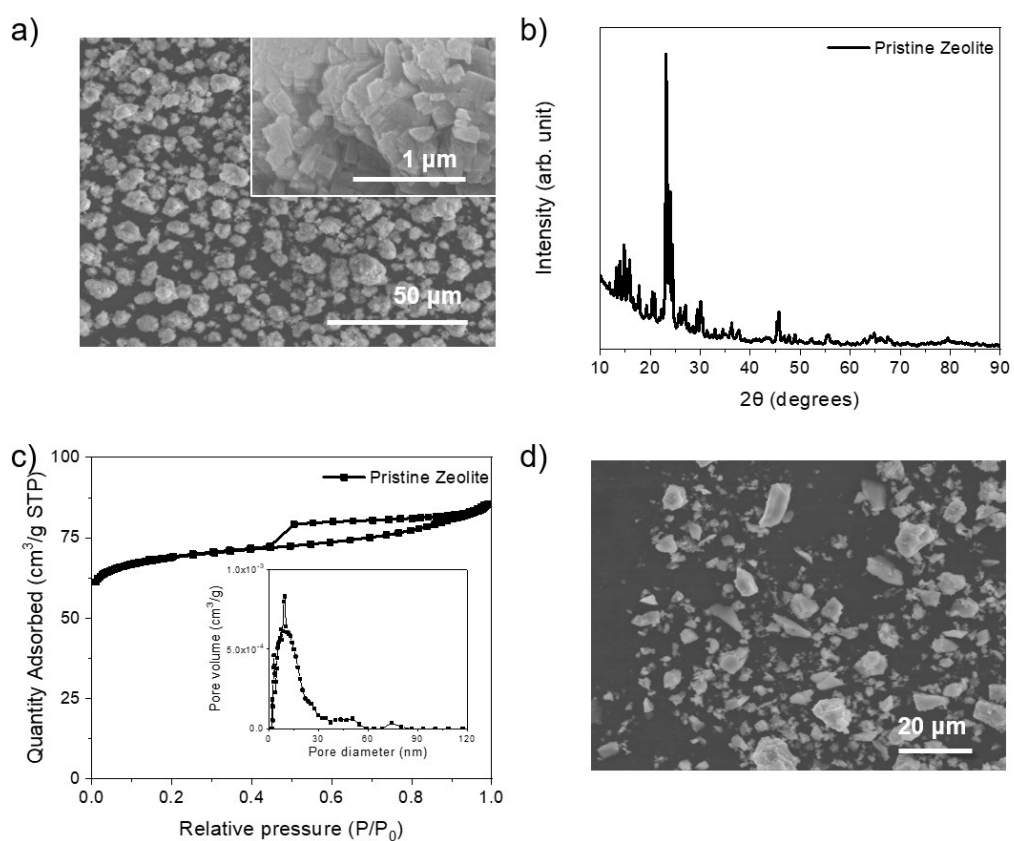

**Fig. S2** (a) FESEM images of ZSM-5 zeolite particles at different magnifications, (b) XRD pattern, (c) N<sub>2</sub> isotherm curve and pore distribution (inset) of ZSM-5 zeolite particles. (d) FESEM image of P-Li<sub>6</sub>PS<sub>5</sub>Cl solid electrolyte.

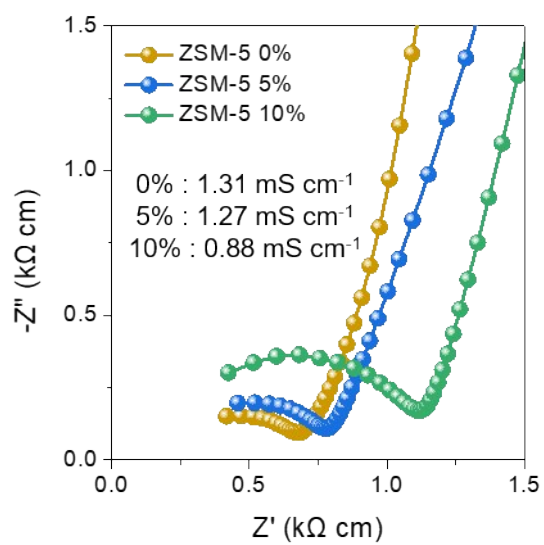

**Fig. S3** Ionic conductivities of Z-Li<sub>6</sub>PS<sub>5</sub>Cl with different contents of ZSM-5 zeolite particle.

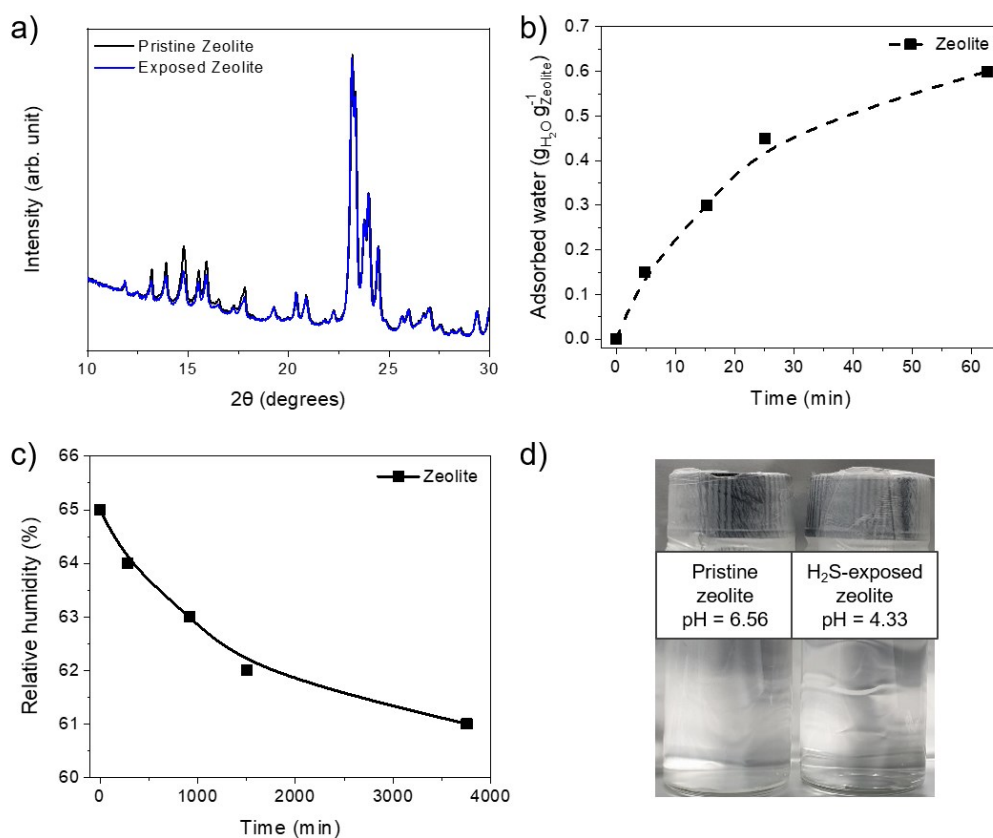

**Fig. S4** (a) XRD patterns of ZSM-5 zeolite particles before and after storage in the chamber under a controlled atmosphere with a relative humidity (RH) of 50%. (b) H<sub>2</sub>O adsorption behavior of the zeolite and (c) relative humidity in the chamber as a function of storage time. (d) Corresponding pH values of pristine and H<sub>2</sub>S exposed zeolite particles after storage.

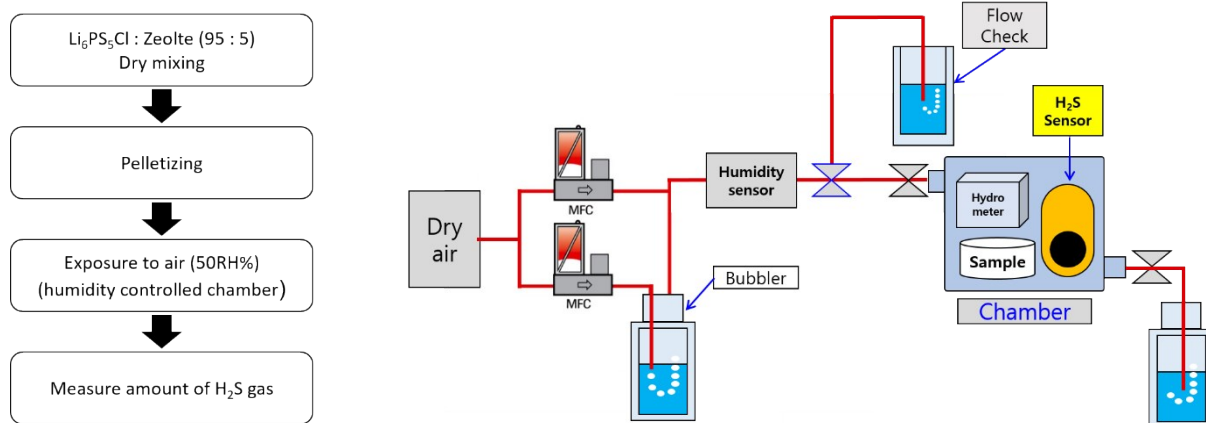

**Fig. S5** Schematic of quantitative measurements for H<sub>2</sub>S concentration as a function of storage time in a sealed chamber under a controlled atmosphere (RH 50%).

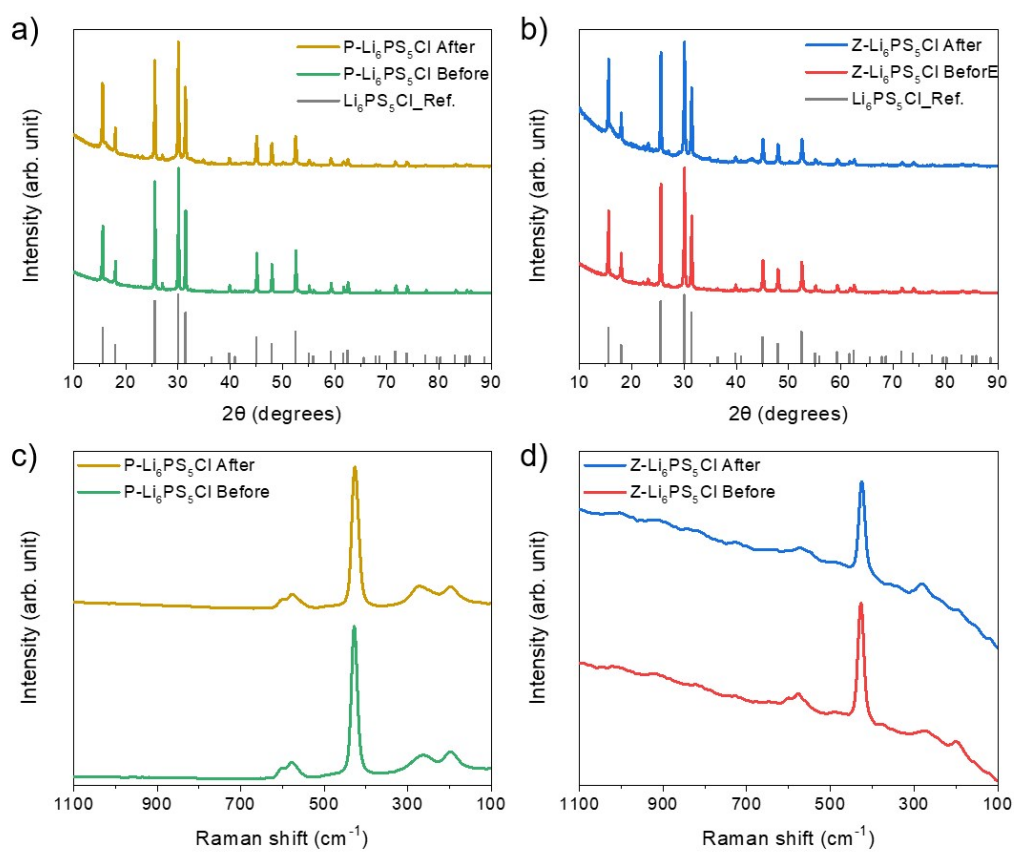

**Fig. S6** XRD patterns of (a) P-Li<sub>6</sub>PS<sub>5</sub>Cl and (b) Z-Li<sub>6</sub>PS<sub>5</sub>Cl, and Raman spectra of (a) P-Li<sub>6</sub>PS<sub>5</sub>Cl and (b) Z-Li<sub>6</sub>PS<sub>5</sub>Cl before and after cycling.

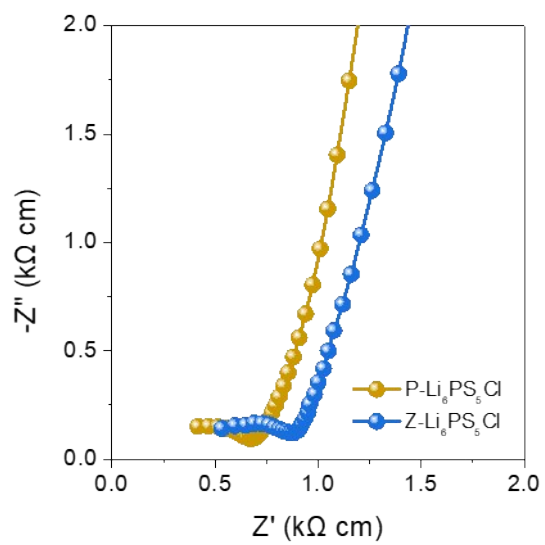

**Fig. S7** Nyquist plots of P-Li<sub>6</sub>PS<sub>5</sub>Cl and Z-Li<sub>6</sub>PS<sub>5</sub>Cl before exposure to humid air (RH50%).
